# Supplementary material
Source: publisher site journal article supplement (https://www.degruyterbrill.com/publication/isbn/9783110312560/downloadAsset/9783110312560_Inhaltsverzeichnis.pdf)
Supplement: Supplementary file 1 [file 9783110312560_Inhaltsverzeichnis.pdf]

# Inhaltsverzeichnis

|                                            |   |
|--------------------------------------------|---|
| <i>Mathilde Hennig</i><br>Einleitung ..... | 1 |
|--------------------------------------------|---|

|                                                                                                                      |    |
|----------------------------------------------------------------------------------------------------------------------|----|
| <i>Clemens Knobloch</i><br>„Ein Teil, das fehlt, geht nie kaputt“ –<br>Ellipsen in Grammatik und Kommunikation ..... | 19 |
|----------------------------------------------------------------------------------------------------------------------|----|

## State of the arts

|                                                                                                                                                   |    |
|---------------------------------------------------------------------------------------------------------------------------------------------------|----|
| <i>Walther Kindt</i><br>Theoretische und methodische Grundlagen<br>der Ellipsenmodellierung. Ergebnisse einer<br>systematischen Betrachtung ..... | 39 |
|---------------------------------------------------------------------------------------------------------------------------------------------------|----|

## Perspektivwechsel I: Vom Ausgelassenen hin zum Realisierten und zu dessen Einbettung in den Kontext

|                                                                                                               |     |
|---------------------------------------------------------------------------------------------------------------|-----|
| <i>Vilmos Ágel/Roland Kebabian</i><br>Sogenannte Koordinationsellipsen:<br>von der Prosodie zur Theorie ..... | 107 |
|---------------------------------------------------------------------------------------------------------------|-----|

|                                                                                                      |     |
|------------------------------------------------------------------------------------------------------|-----|
| <i>Gert Rickbeitz/Lorenz Siebelschmidt</i><br>Verstehen von Ellipsen – ein holistischer Ansatz ..... | 159 |
|------------------------------------------------------------------------------------------------------|-----|

|                                                                                                                                                                      |     |
|----------------------------------------------------------------------------------------------------------------------------------------------------------------------|-----|
| <i>Andreas Lötscher</i><br>Einsetzen – finden – erfinden – vermuten – erraten?<br>Ellipsenverstehen aus der Perspektive von Textverstehen<br>und Textbedeutung ..... | 183 |
|----------------------------------------------------------------------------------------------------------------------------------------------------------------------|-----|

## Perspektivwechsel II: Neue Perspektiven auf das Phänomen Ellipse

### Dependenzgrammatik

|                                                                                                                                                      |     |
|------------------------------------------------------------------------------------------------------------------------------------------------------|-----|
| <i>Albrecht Plewnia</i><br>Möglichkeiten und Wahrscheinlichkeiten. Was man in der<br>Dependenzgrammatik mit syntaktischen Leerstellen tun kann ..... | 227 |
|------------------------------------------------------------------------------------------------------------------------------------------------------|-----|

## Semantik verbloser Sätze

*Irmtraud Behr*

Syntaktisch-grammatische Aspekte von verblosen Sätzen  
 nach dem logisch-semantischen Modell von J.M. Zemb ..... 253

## Interaktionale Linguistik

*Wolfgang Imo*

Ellipsen und Verstehen in der Interaktion ..... 281

## Computerlinguistik

*Karin Harbusch*

Regeln zur einheitlichen, psycholinguistisch motivierten Erzeugung  
 von Ellipsen in Satzkoordinationen im Deutschen, Estnischen,  
 Niederländischen und Ungarischen ..... 321

**Perspektivwechsel III:  
 Eine neue Perspektive auf Kontextkontrolliertheit**

*Mathilde Hennig*

Was ist Kontextkontrolliertheit? Subjektellipsen  
 in neuhochdeutschen Nähetexten als Prüfstein für die  
 grammatische und psycholinguistische Theoriebildung ..... 351

**Experimentelles***Volker Emmrich*

Die Ellipse: ein am Verstehen orientiertes Modell ..... 405

**Anhang**

Sachregister ..... 443

Personenregister ..... 459

Autorenverzeichnis ..... 463
